# Supplementary material for: High-sensitivity tracing of stable isotope labeled Ag nanoparticles in environmental samples using MC-ICP-MS
Source: Royal Society of Chemistry journal article supplement (doi:10.1039/c8ja00358k), 2019-01-01
Supplement: c8ja00358k1.pdf [file c8ja00358k1.pdf]

1 *Electronic Supplementary Information for*

2  
3 **High-sensitivity tracing of stable isotope labeled Ag**  
4 **nanoparticles in environmental samples**  
5 **using MC-ICP-MS**

6  
7  
8 Tabea Junk<sup>1</sup>, Mark Rehkämper<sup>1\*</sup> and Adam Laycock<sup>1</sup>

9  
10  
11  
12  
13 <sup>1</sup> Department of Earth Science and Engineering, Imperial College London, London SW7 2AZ,  
14 UK

15  
16  
17  
18  
19  
20  
21  
22 \* Corresponding author: markrehk@imperial.ac.uk

23

24

25

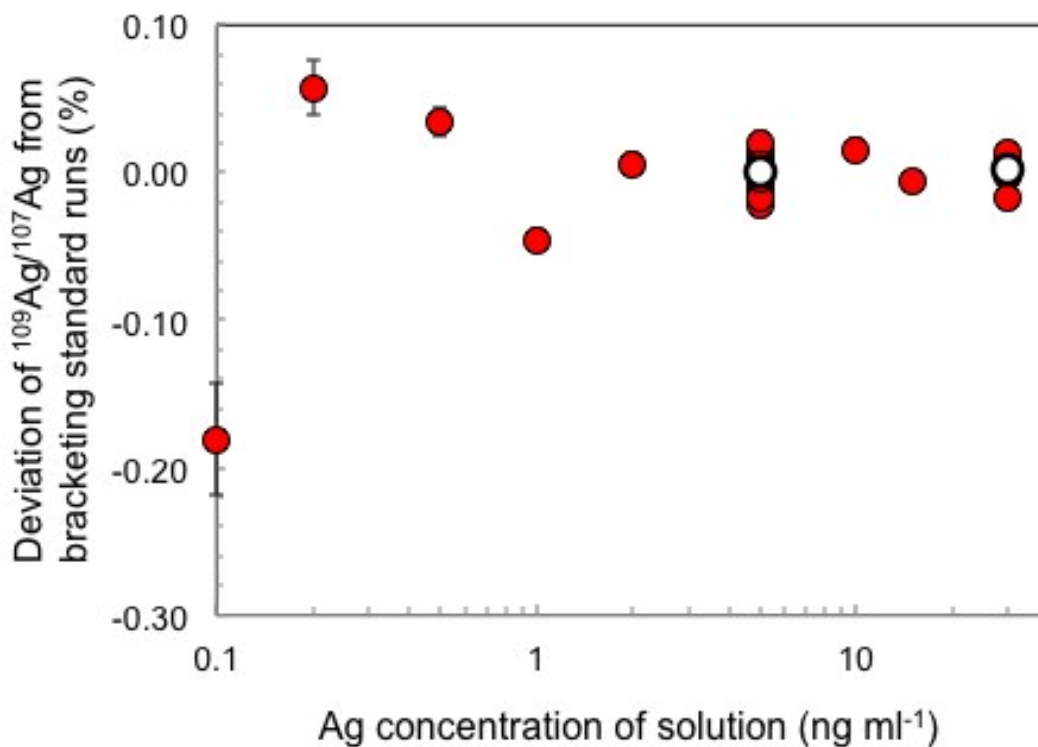

26

27

28

29

30 **Fig. S1.** Relative deviation (in %) of measured  $^{109}\text{Ag}/^{107}\text{Ag}$  ratios for natural Ag solutions  
31 from the mean result obtained for bracketing standards runs, which were conducted using Ag  
32 concentrations of 5  $\text{ng ml}^{-1}$  and 30  $\text{ng ml}^{-1}$ . Red symbols denote results for individual  
33 analyses, which show no trend with changing Ag concentration. The open symbols denote the  
34 mean results for multiple runs of the 5  $\text{ng ml}^{-1}$  and 30  $\text{ng ml}^{-1}$  standard solutions. Error bars  
35 (often smaller than symbol size) denote the 1 SE within-run error of the measurements.

36

37

38

39

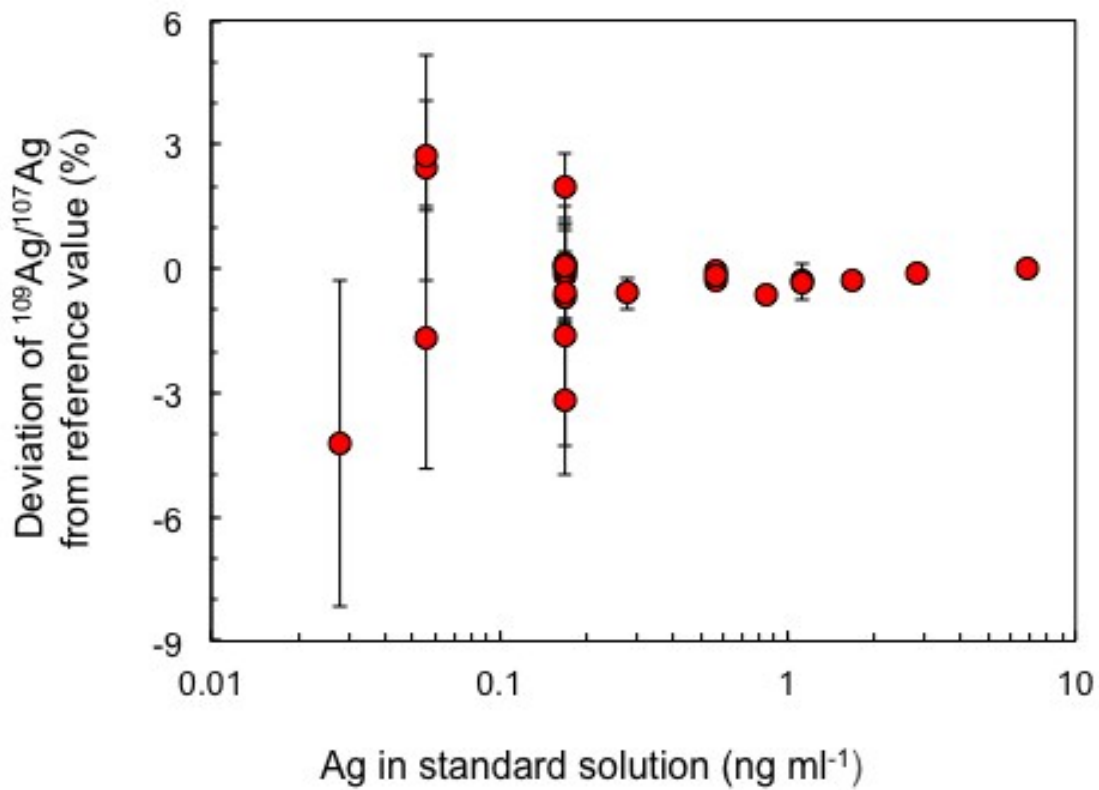

40

41

42

43

44 **Fig. S2.** Relative deviation (in %) for  $^{109}\text{Ag}/^{107}\text{Ag}$  data obtained in individual analyses of  
45 mixed Ag-En + Ag-Nat solutions (with  $^{109}\text{Ag}/^{107}\text{Ag} \approx 18$ ) from the reference value (as  
46 determined by multiple analyses at high Ag concentration). The error bars denote the 1 SE  
47 within-run error of the measurements and are often smaller than the symbol size.

48

49

50

51

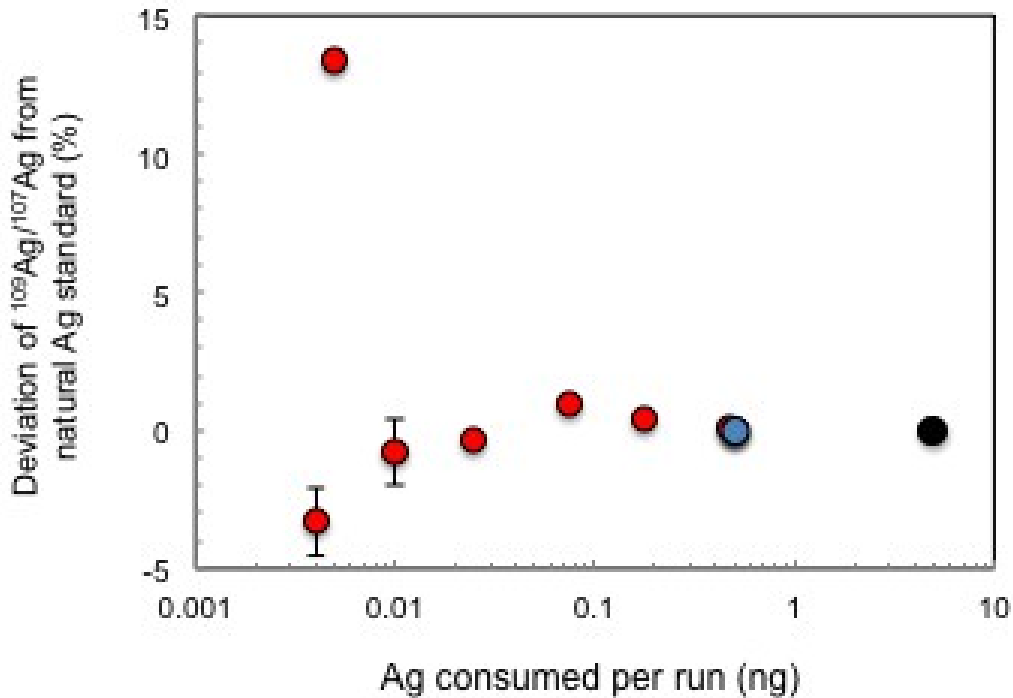

52

53

54

55

56 **Fig. S3.** Relative deviation (in %) for the  $^{109}\text{Ag}/^{107}\text{Ag}$  ratios of unspiked environmental  
57 samples (with only Ag-Nat present) from the reference value. Red symbols denote results for  
58 individual sample solutions (see Table 4, main text). The blue symbol denotes the mean value  
59 obtained for analyses of several aliquots of a single Lufa 2.2 Soil digest (Soil D1; Table 4,  
60 main text). The black symbol is the mean value for multiple analyses of a  $5 \text{ ng ml}^{-1}$  natural Ag  
61 standard solution. Error bars (often smaller than symbol size) denote the 1 SD determined  
62 from multiple sample analyses (see Table 4, main text).

63

64
